# Supplementary material
Source: PubMed Central journal article supplement (PMC1804373)
Supplement: JCI0730102sd.pdf [file JCI0730102sd.pdf]

**Supplementary Data. Shared changes in WM35 and WM35 PKB cells with respect to consensus revised Cambridge mitochondrial sequence**

| position        | MITO <sup>1</sup> | WM35           | WM35 PKB | amino acid change | transition(ti)/<br>transversion(tv) | sequence region                                               | amino acid position <sup>2</sup> | protein region <sup>3</sup> | degree of conservation <sup>4</sup> |
|-----------------|-------------------|----------------|----------|-------------------|-------------------------------------|---------------------------------------------------------------|----------------------------------|-----------------------------|-------------------------------------|
| 5280            | A                 | T              | T        | Thr→Ser           | tv                                  | ND2 (4470-5511)                                               | 271                              | —                           | low                                 |
| 5319            | A                 | C              | C        | Thr→Pro           | tv                                  | ND2                                                           | 284                              | TM                          | low                                 |
| 6385            | C                 | no seq<br>data | G        | Ala→Gly           | tv                                  | COI (5904-7445)                                               | 161                              | TM                          | high                                |
| 7832,<br>7834   | A,C               | G,G            | G,G      | Ile→Val           | ti & tv                             | COII (7586-8269)                                              | 83                               | TM                          | intermediate                        |
| 7888            | C                 | G              | G        | NC                | tv                                  | COII                                                          | 101                              | —                           | —                                   |
| 7893            | A                 | G              | G        | Gln→Arg           | ti                                  | COII                                                          | 103                              | —                           | complete                            |
| 7898            | T                 | G              | G        | Tyr→Asp           | tv                                  | COII                                                          | 105                              | —                           | high                                |
| 7916            | A                 | G              | G        | Thr→Ala           | ti                                  | COII                                                          | 111                              | —                           | intermediate                        |
| 12290           | A                 | G              | G        | NC                | ti                                  | tRNA <sup>leu</sup><br>(12266-12336)<br>ND5 (12337-<br>14148) | 3                                | —                           | —                                   |
| 12343           | A                 | G              | G        | Met→Val           | ti                                  | ND5                                                           | 6                                | LC                          | low                                 |
| 12354           | T                 | G              | G        | NC                | tv                                  | ND5                                                           | 9                                | —                           | —                                   |
| 12361           | A                 | G              | G        | Thr→Ala           | ti                                  | ND5                                                           | 12                               | LC                          | low                                 |
| 12371           | T                 | G              | G        | Leu→Arg           | tv                                  | ND5                                                           | 24                               | LC                          | low                                 |
| 12407           | T                 | G              | G        | Val→Gly           | tv                                  | ND5                                                           | —                                | —                           | very low                            |
| 12437-<br>12438 | A,T               | T,G            | T,G      | His→Leu           | tv                                  | ND5                                                           | 34                               | —                           | low                                 |
| 12444           | A                 | G              | G        | Val→Gly           | ti                                  | ND5                                                           | 36                               | TM                          | very low                            |
| 12446           | A                 | G              | G        | Lys→STOP          | ti                                  | ND5                                                           | 37                               | TM                          | low                                 |
| 12448           | T                 | G              | G        | Ser→Ala           | tv                                  | ND5                                                           | 38                               | TM                          | low                                 |
| 12465           | C                 | A              | A        | NC                | tv                                  | ND5                                                           | 43                               | —                           | —                                   |
| 12468           | T                 | A              | A        | Phe→Leu           | tv                                  | ND5                                                           | 44                               | TM                          | high                                |
| 12471           | T                 | C              | C        | NC                | ti                                  | ND5                                                           | 45                               | —                           | —                                   |
| 12474           | C                 | G              | G        | Ile→Met           | tv                                  | ND5                                                           | 46                               | TM                          | intermediate                        |
| 12475           | A                 | C              | C        | Ser→Arg           | tv                                  | ND5                                                           | 47                               | TM                          | complete                            |
| 12488           | C                 | G              | G        | Thr→STOP          | tv                                  | ND5                                                           | 51                               | TM                          | intermediate                        |
| 12492           | A                 | G              | G        | NC                | ti                                  | ND5                                                           | 52                               | —                           | —                                   |

|        |     |     |     |         |         |     |    |    |              |
|--------|-----|-----|-----|---------|---------|-----|----|----|--------------|
| 12507  | A   | G   | G   | NC      | ti      | ND5 | 57 | —  | —            |
| 12508  | G   | A   | A   | Asp→Asn | ti      | ND5 | 58 | TM | low          |
| 12513  | A   | G   | G   | NC      | ti      | ND5 | 59 | —  | —            |
| 12577- |     |     |     |         |         |     |    |    |              |
| 12578  | A,A | G,C | G,C | Lys→Ala | ti & tv | ND5 | 81 | —  | intermediate |
| 12594  | C   | G   | G   | NC      | tv      | ND5 | 86 | —  | —            |
| 12612  | A   | G   | G   | NC      | ti      | ND5 | 92 | —  | —            |
| 12616  | T   | G   | G   | Leu→Val | tv      | ND5 | 94 | TM | high         |

1. MITO refers to the Revised Cambridge Mitochondrial Sequence in which rare polymorphisms have been excluded.
2. Amino acid position denotes position within the gene product.
3. Protein region denotes whether mutation occurs in a transmembrane domain (TM) or low complexity (LC) region of the gene product.
4. Indicates degree of cross-species conservation.
